# Supplementary material for: Human keratinocytes are efficiently immortalized by a Rho kinase inhibitor
Source: JCI journal article supplement (doi:10.1172/jci42297), 2010-06-01
Supplement: sd1 [file 1]

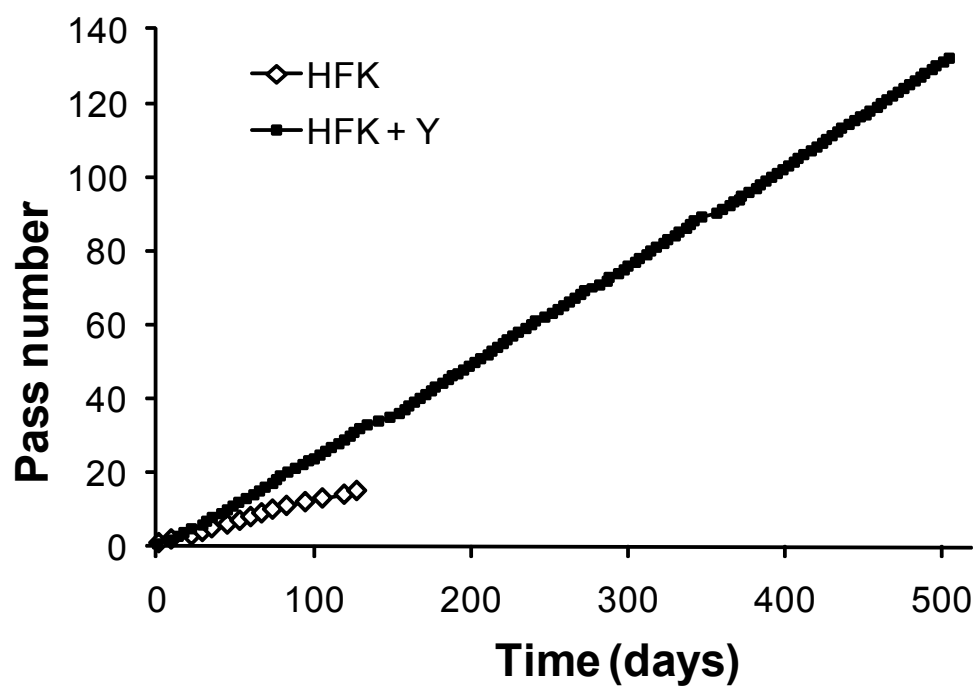

**Supplementary Figure 1. Treatment with Y-27632 immortalizes primary keratinocytes.** Human foreskin keratinocytes (HFK:a strain) were cultured in the presence (solid squares) or absence (open diamonds) of 10 $\mu$ M Y-27632. Cells were passed at a ratio 1:10 at the times shown, with a few exceptions when cells were split 1:20.

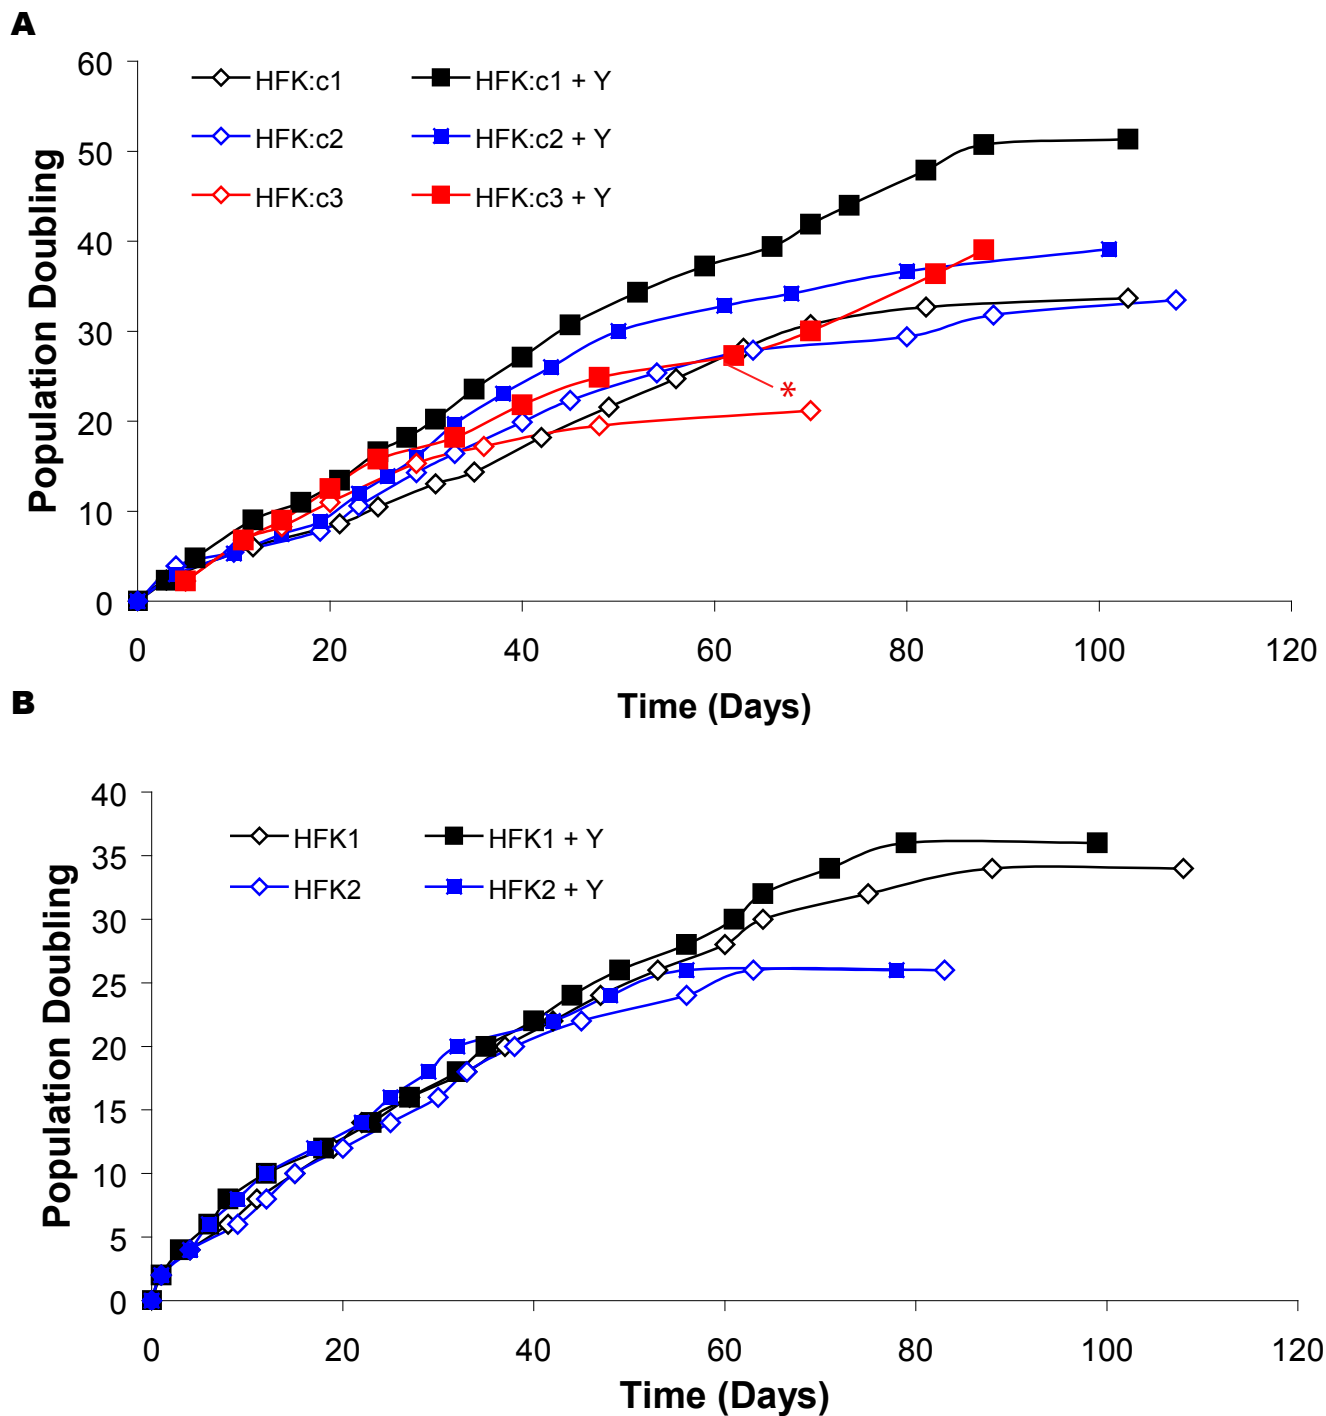

**Supplementary Figure 2: Y27632 does not immortalize keratinocytes in the absence of feeder fibroblasts.** HFKs were passed on five separate occasions on plastic in (A) serum-free 154 medium or in (B) KGM media in the presence or absence of (B) 5 $\mu$ M or (A) 10 $\mu$ M Y-27632. All cells became senescent and ceased growing at the times indicated, except for HFK:c3 + Y, where cells grew out after crisis (\*).

**HFK:a, P5**

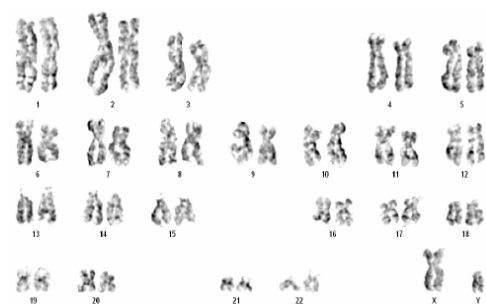

**HFK:a + Y, P94**

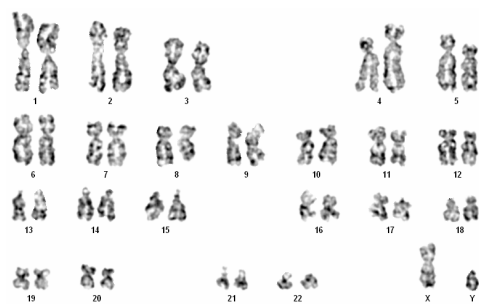

**Supplementary Figure 3 Y-27632 immortalized keratinocytes show no major chromosomal abnormalities**  
Karyotype of the HFK:a strain at passage 5 and after 95 passages in Y-27632.

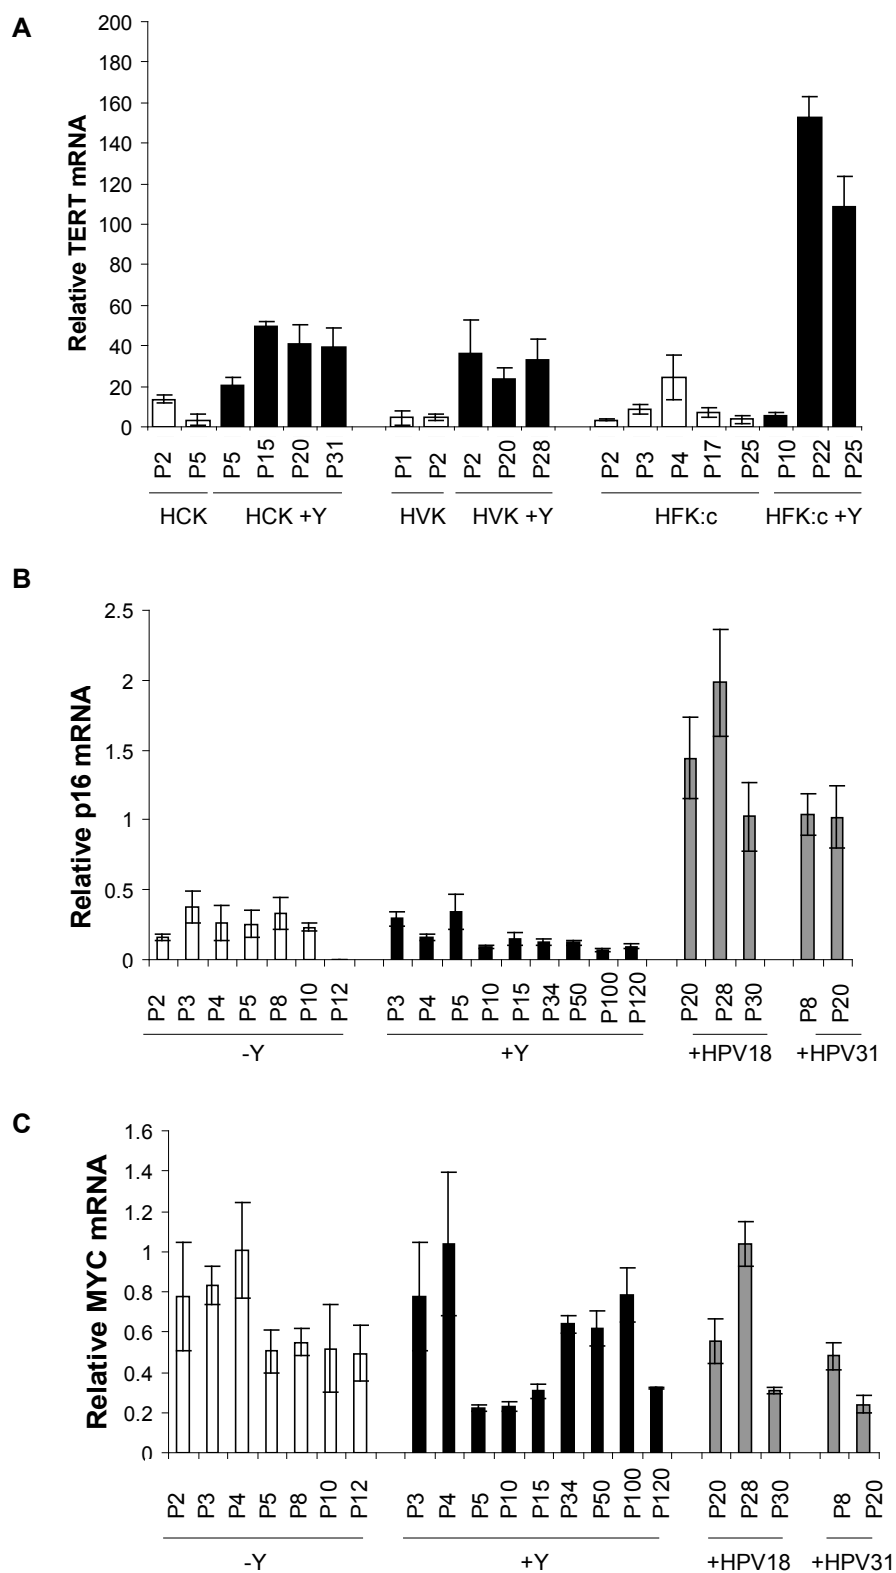

**Supplementary Figure 4.** Relative mRNA levels of hTERT, p16INK4 and MYC in Y-27632-treated cells. A. Levels of hTERT mRNA were determined in HFK:c strain, HCK and HVK cells cultured in the absence or presence of Y-27632 by QRT-PCR. B. Levels of myc mRNA were determined in HFK:a strain cultured in the absence or presence of Y-27632, HPV18 immortalized keratinocytes and HPV31 containing CIN612 cells QRT-PCR. C. Levels of p16INK4 mRNA were determined in HFK:a strain cultured in the absence or presence of Y-27632, HPV18 immortalized keratinocytes and HPV31 containing CIN612 cells QRT-PCR. In each case, the levels of mRNA were standardized relative to GAPDH transcript levels. Each value represents the mean of replicate values  $\pm$  SD.

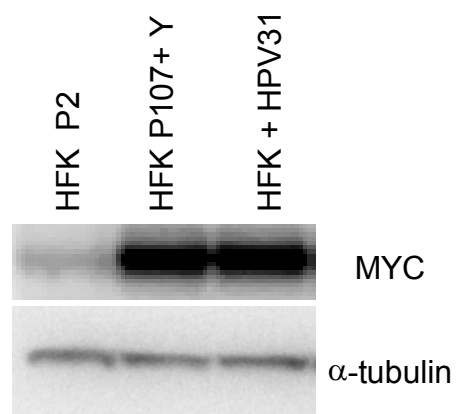

**Supplementary Figure 5 MYC protein levels are upregulated in Y-27632 immortalized cells at a late passage.** Immunoblot analysis of MYC protein in HFK:a strain at passage 2, or after 107 passages in 10μM Y-27632. CIN-612 cells, containing the oncogenic HPV31, are included as a comparison. Tubulin is included as a loading control.

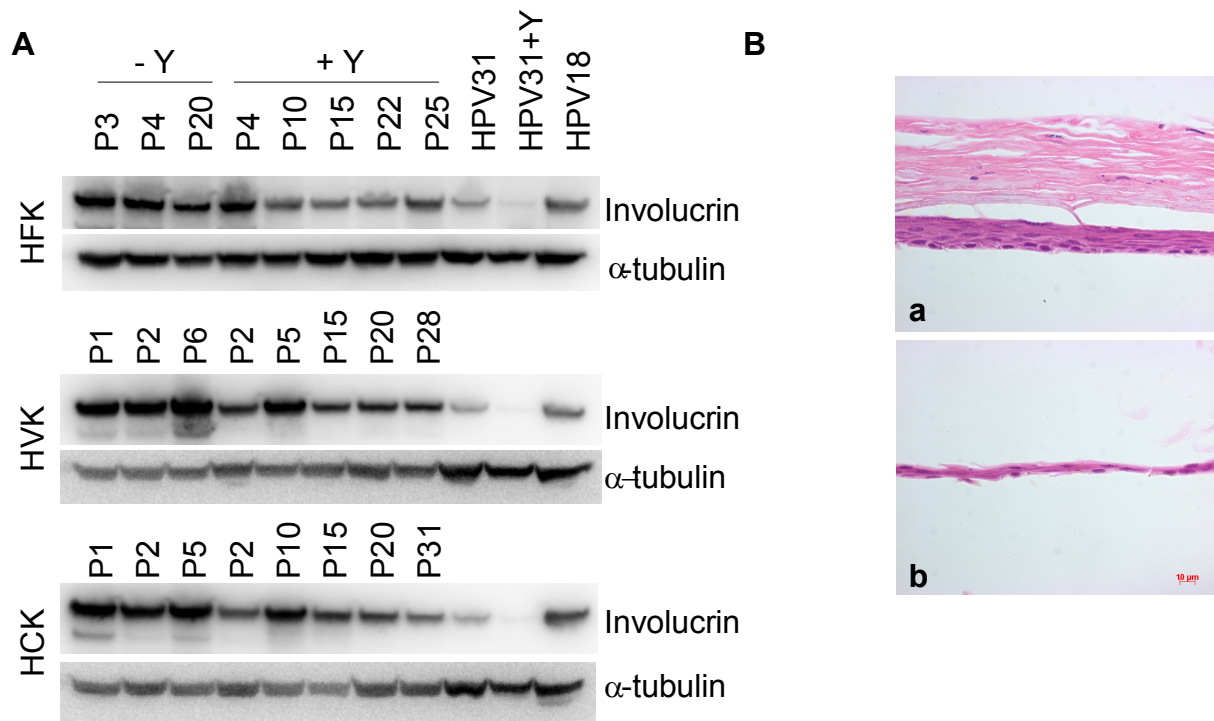

**Supplementary Figure 6. Y-27632 inhibits differentiation in monolayer and organotypic raft culture**

A. Immunoblot analysis of Involucrin proteins in HFK strain c, HVK, and HCK cells in the absence or presence of 10 $\mu$ M Y-27632, collected at the pass indicated. Cells containing oncogenic HPV31 and HPV18 viruses are included as controls. HPV 31 +Y was grown in 10 $\mu$ M Y-27632 for 15 passes.

B. HFK P1 keratinocytes grown in organotypic raft culture for 14 days in raft media (a) without or (b) with 10 $\mu$ M Y-27632 .

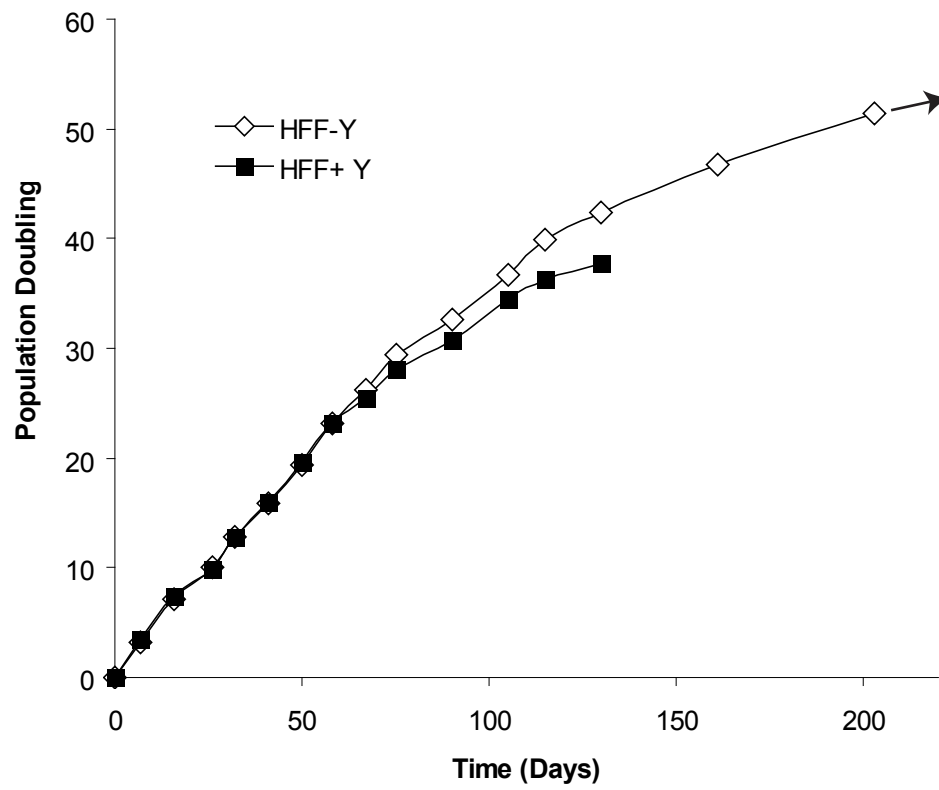

**Supplementary Figure 7. Treatment with Y-27632 does not immortalize primary human foreskin fibroblasts.** Human foreskin fibroblasts were cultured in the presence (solid squares) or absence (open diamonds) of 10 $\mu$ M Y-27632. Cells were passed when confluent at the times shown. Arrow indicates continued growth.

| STR locus         | Allele present |                  |
|-------------------|----------------|------------------|
|                   | HFK:a<br>P4    | HFK:a +Y,<br>P94 |
| <b>D5S818</b>     | 11             | 11               |
| <b>D13S317</b>    | 11,13          | 11,13            |
| <b>D7S820</b>     | 10             | 10               |
| <b>D16S539</b>    | 11,12          | 11,12            |
| <b>vWA</b>        | 16,17          | 16,17            |
| <b>TH01</b>       | 6,9            | 6,9              |
| <b>Amelogenin</b> | X,Y            | X,Y              |
| <b>TPOX</b>       | 8,11           | 8,11             |
| <b>CSF1PO</b>     | 11,12          | 11,12            |

**Supplementary Table 1. Short Tandem Repeat Analysis of HFK:a strain**

The HFK:a strain was analyzed at P4 and after 94 passages in the presence of Y-27632
